# Supplementary material for: Long Non-Coding RNAs Associated with Mitogen-Activated Protein Kinase in Human Pancreatic Cancer
Source: MDPI journal article supplement (doi:10.3390/cancers15010303), 2023-01-02
Supplement: s1 [file s1]

## Methodological flowchart

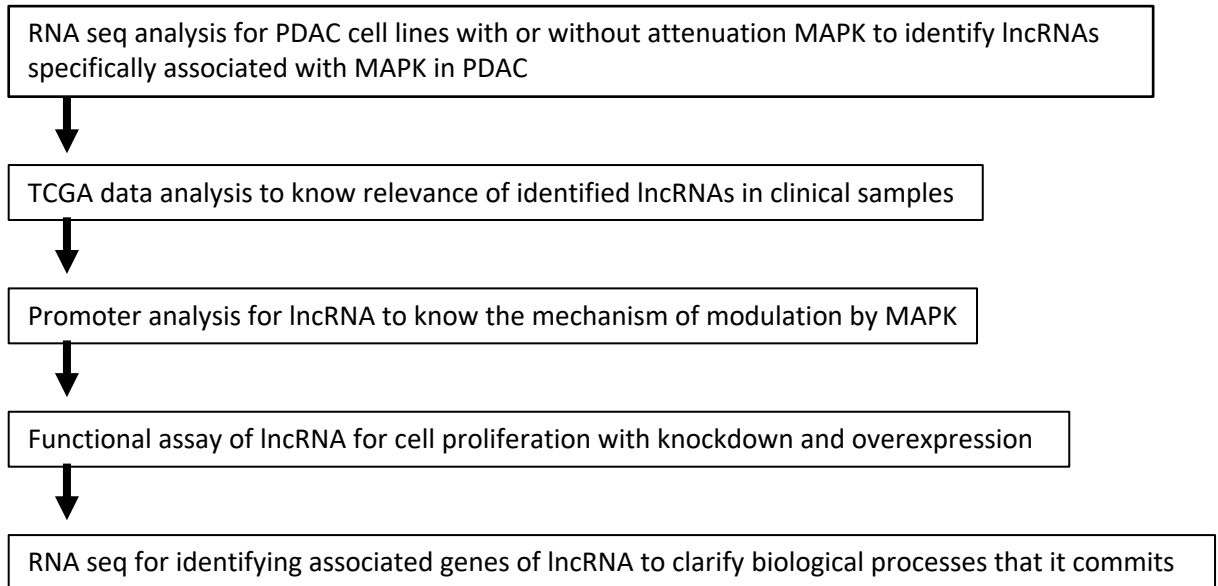

**Supplementary Figure S1.** Methodological flowchart of this study.

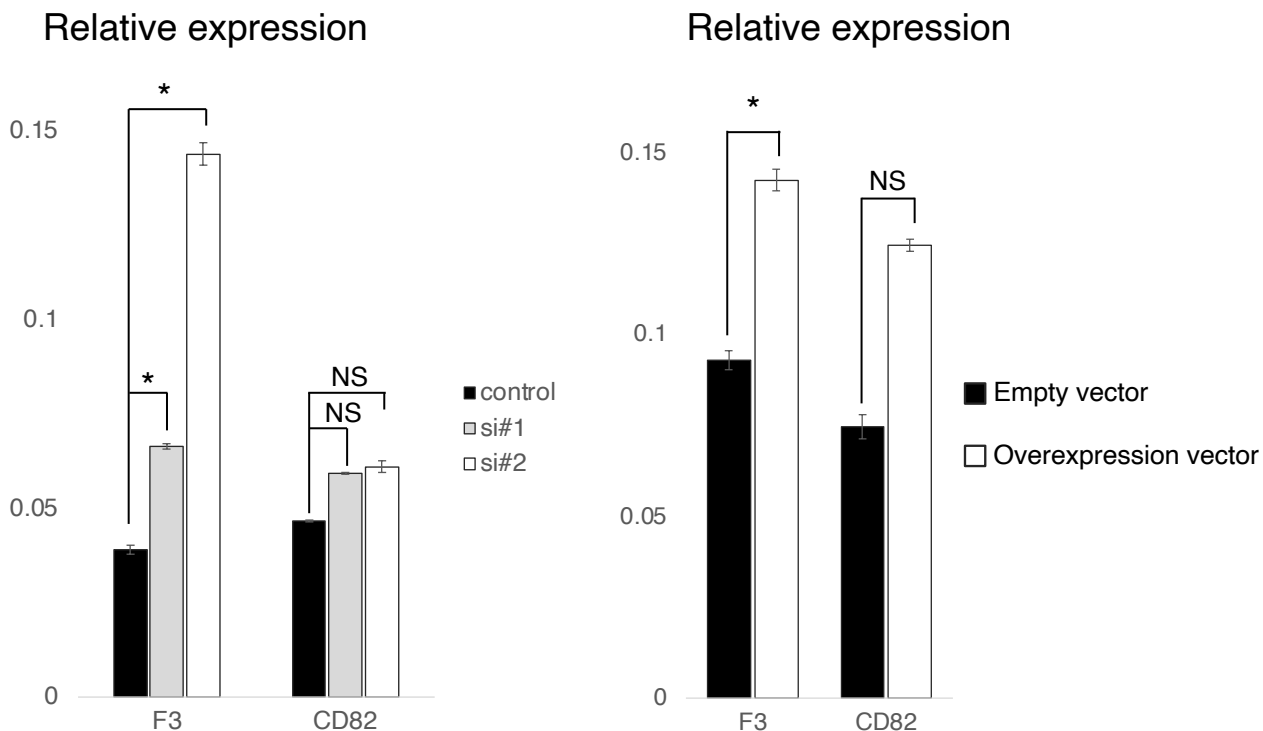

**Supplementary Figure S2.** qRT-PCR of *LINC00941*-associated genes in AsPC-1.

Both the downregulation and upregulation of *LINC00941* resulted in the upregulation of *F3* and *CD82*, which suggested *LINC00941* does not directly regulate them.

Abbreviation; NS, no significance. \* $p < 0.05$

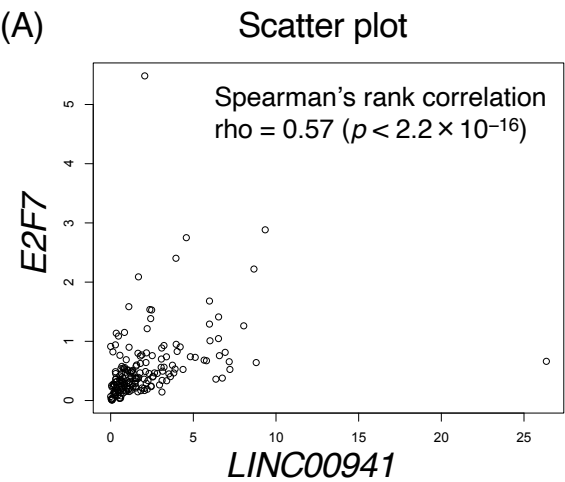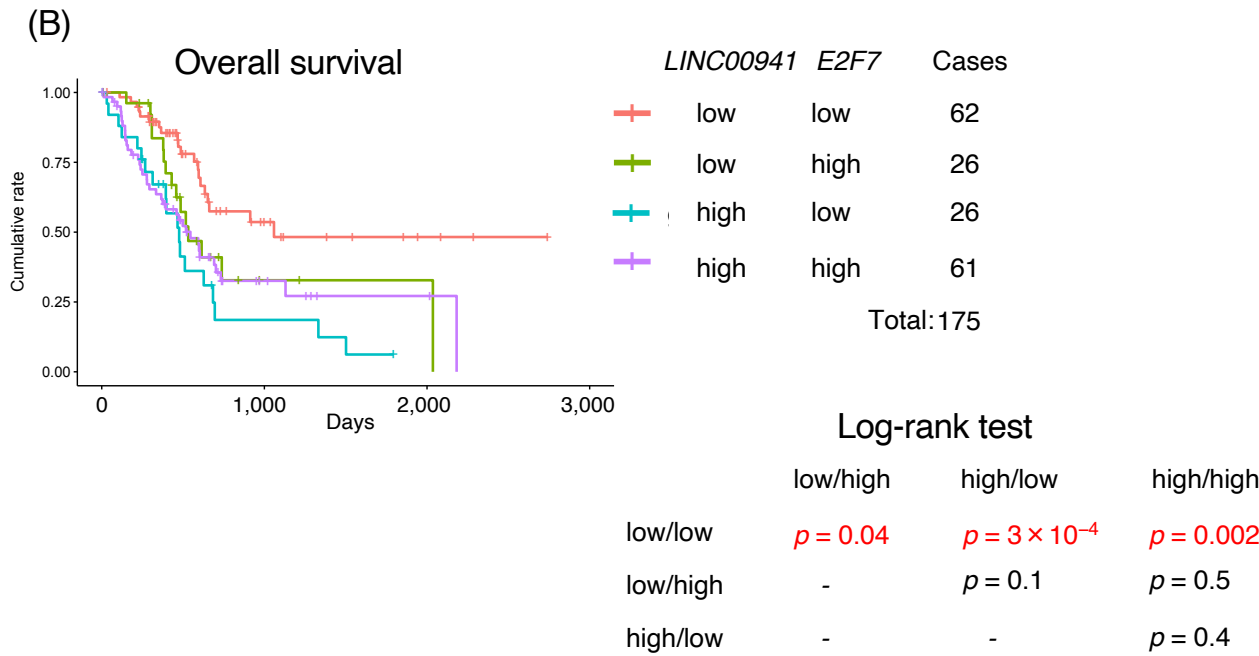

**Supplementary Figure S3.** Correlation between LINC00941 and E2F7 based on TCGA database analysis. (A) A positive correlation was observed between gene expression levels of *LINC00941* and *E2F7*. (B) Kaplan-Meier plot comparing the overall survival of the groups classified based on the gene expression level of *LINC00941* and *E2F7*. The low/low group showed a better prognosis than others.
